# Supplementary material for: Multiplex Quantitative Analysis of 9 Compounds of Scutellaria baicalensis Georgi in the Plasma of Respiratory Syncytial Virus-Infected Mice Based on HPLC-MS/MS and Pharmacodynamic Effect Correlation Analysis
Source: MDPI journal article supplement (doi:10.3390/molecules28166001), 2023-08-10
Supplement: s1 [file s1]

### Supplementary Materials:

#### 1. Identification of the components of *Scutellaria baicalensis* Georgi in mice plasma

The TIC maps of mice plasma samples collected by high-performance liquid chromatography-electrostatic field orbitrap high-resolution mass spectrometry (HPLC-Orbitrap Exploris 120 MS) and the quasi-molecular ions and fragmentation ion information obtained. Finally, the fragmentation information of the compounds in the blood samples was compared with the secondary fragment ion information of the components of *Scutellaria baicalensis* Georgi to speculate the composition of *Scutellaria baicalensis* Georgi in respiratory syncytial virus (RSV)-infected mice. The total ion current diagram and fragment information of the compounds in mice plasma were shown in Figure S1, Table S1.

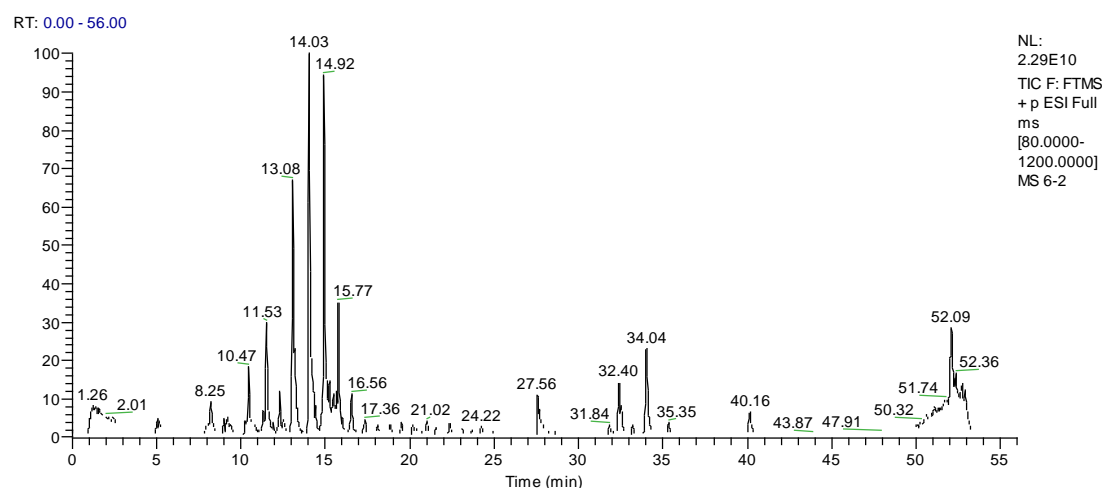

**Figure S1. Qualitative identification chromatograms of 9 compounds in mice plasma**

**Table S1. Qualitative identification of 9 compounds in mice plasma**

| <b>NO.</b> | <b>Molecular formula</b>                                       | <b>Measured value</b> | <b>Secondary ion</b>        | <b>compounds</b>                  | <b>ESI Mode</b> |
|------------|----------------------------------------------------------------|-----------------------|-----------------------------|-----------------------------------|-----------------|
| 1          | C <sub>15</sub> H <sub>10</sub> O <sub>5</sub>                 | 271.06                | 253.04, 123.00              | Baicalein                         | +/-             |
| 2          | C <sub>21</sub> H <sub>18</sub> O <sub>11</sub>                | 447.09                | 271.05,253.05,169.01,123.00 | Apigenin-7-glucuronide            | +/-             |
| 3          | C <sub>21</sub> H <sub>18</sub> O <sub>11</sub>                | 447.09                | 271.05,253.04,169.01,123.00 | Baicalin                          | +/-             |
| 4          | C <sub>22</sub> H <sub>20</sub> O <sub>11</sub>                | 461.10                | 285.07, 270.05              | Oroxylin A 7-O-beta-D-glucuronide | +/-             |
| 5          | C <sub>22</sub> H <sub>20</sub> O <sub>11</sub>                | 461.10                | 285.07, 270.05              | Wogonoside                        | +/-             |
| 6          | C <sub>15</sub> H <sub>10</sub> O <sub>5</sub>                 | 271.05                | 253.05                      | Norwogonin                        | +/-             |
| 7          | C <sub>16</sub> H <sub>12</sub> O <sub>5</sub>                 | 285.07                | 270.05, 168.00              | Wogonin                           | +/-             |
| 8          | C <sub>15</sub> H <sub>10</sub> O <sub>4</sub>                 | 255.06                | 153.07                      | Chrysin                           | +               |
| 9          | C <sub>16</sub> H <sub>12</sub> O <sub>5</sub>                 | 285.07                | 270.05, 168.00              | Oroxylin A                        | +/-             |
| 10         | C <sub>8</sub> H <sub>13</sub> N <sub>3</sub> O <sub>4</sub> S | 248.14                | 121.10, 85.02               | Tinidazole (IS)                   | +               |

**Table S2.** Detection results of drug-containing plasma content at different time points (mean  $\pm$  SD,  $n = 6$ ).

| Time (h) | Baicalein          | Apigenin-7-glucuronide | Baicalin             | Oroxylin A<br>7-O-beta-D-glucuronide | Wogonoside           | Norwogonin        | Wogonin              | Chrysin          | Oroxylin A           |
|----------|--------------------|------------------------|----------------------|--------------------------------------|----------------------|-------------------|----------------------|------------------|----------------------|
| 0.083    | 235.76 $\pm$ 21.97 | 4725.60 $\pm$ 214.70   | 2434.28 $\pm$ 151.56 | 462.93 $\pm$ 10.74                   | 553.37 $\pm$ 9.22    | 28.17 $\pm$ 2.96  | 344.59 $\pm$ 1.64    | 0                | 13.47 $\pm$ 9.43     |
| 0.167    | 573.93 $\pm$ 23.68 | 6986.86 $\pm$ 153.57   | 4607.45 $\pm$ 318.09 | 603.78 $\pm$ 13.98                   | 1829.58 $\pm$ 102.08 | 94.18 $\pm$ 5.68  | 981.37 $\pm$ 13.72   | 0                | 745.77 $\pm$ 35.54   |
| 0.25     | 437.59 $\pm$ 15.17 | 4610.60 $\pm$ 192.08   | 2031.56 $\pm$ 103.57 | 143.83 $\pm$ 6.73                    | 928.49 $\pm$ 33.77   | 23.48 $\pm$ 0.05  | 471.39 $\pm$ 1.78    | 0                | 63.52 $\pm$ 1.32     |
| 0.5      | 243.84 $\pm$ 16.32 | 4344.98 $\pm$ 173.73   | 2696.64 $\pm$ 110.33 | 315.26 $\pm$ 12.78                   | 776.20 $\pm$ 41.04   | 13.88 $\pm$ 4.73  | 222.21 $\pm$ 6.76    | 10.37 $\pm$ 2.12 | 40.44 $\pm$ 4.81     |
| 1        | 208.98 $\pm$ 14.58 | 1590.11 $\pm$ 125.69   | 2474.37 $\pm$ 225.92 | 138.74 $\pm$ 3.62                    | 1078.05 $\pm$ 63.01  | 12.42 $\pm$ 7.14  | 181.04 $\pm$ 4.74    | 15.38 $\pm$ 4.94 | 160.88 $\pm$ 15.86   |
| 2        | 25.73 $\pm$ 5.59   | 2934.42 $\pm$ 221.23   | 2620.76 $\pm$ 117.82 | 315.26 $\pm$ 12.78                   | 1333.51 $\pm$ 38.28  | 0                 | 10.35 $\pm$ 1.79     | 21.43 $\pm$ 4.86 | 75.84 $\pm$ 5.43     |
| 4        | 43.00 $\pm$ 8.66   | 1037.07 $\pm$ 106.48   | 1587.10 $\pm$ 169.68 | 412.32 $\pm$ 18.42                   | 1372.78 $\pm$ 53.34  | 14.29 $\pm$ 9.94  | 71.39 $\pm$ 17.8     | 12.37 $\pm$ 2.12 | 486.23 $\pm$ 8.65    |
| 6        | 792.15 $\pm$ 41.3  | 9344.98 $\pm$ 327.73   | 8607.45 $\pm$ 428.09 | 1008.71 $\pm$ 54.19                  | 3829.58 $\pm$ 182.08 | 113.88 $\pm$ 4.73 | 2664.55 $\pm$ 129.18 | 60.64 $\pm$ 2.86 | 1063.52 $\pm$ 101.32 |
| 8        | 184.80 $\pm$ 29.24 | 2958.20 $\pm$ 207.61   | 1856.98 $\pm$ 113.03 | 286.84 $\pm$ 8.27                    | 1825.89 $\pm$ 177.13 | 21.94 $\pm$ 0.43  | 97.31 $\pm$ 2.71     | 0                | 300.68 $\pm$ 17.25   |
| 10       | 120.93 $\pm$ 15.03 | 896.04 $\pm$ 55.63     | 569.32 $\pm$ 20.22   | 160.51 $\pm$ 5.17                    | 318.50 $\pm$ 23.92   | 16.07 $\pm$ 3.80  | 14.65 $\pm$ 8.42     | 0                | 19.18 $\pm$ 2.56     |
| 12       | 9.28 $\pm$ 5.01    | 47.32 $\pm$ 11.82      | 39.89 $\pm$ 7.45     | 29.40 $\pm$ 0.71                     | 188.85 $\pm$ 19.38   | 0                 | 3.41 $\pm$ 5.28      | 0                | 13.60 $\pm$ 7.94     |
| 24       | 1.42 $\pm$ 5.86    | 23.55 $\pm$ 2.60       | 15.44 $\pm$ 5.62     | 0                                    | 0                    | 0                 | 0                    | 0                | 0                    |
